# Supplementary material for: Design, synthesis, analgesic, antibacterial and docking studies of novel 8-piperazinylcaffeine carboxylate ionic liquids
Source: Royal Society of Chemistry journal article supplement (doi:10.1039/d4ra06244b), 2024-01-01

## RSC Advances

### (Electronic Supplementary Information)

---

# Design, synthesis, analgesic, antibacterial and docking studies of novel 8-piperazinylcaffeine carboxylate ionic liquids

Mohammad Navid Soltani Rad, <sup>a,b\*</sup> Somayeh Behrouz, <sup>a,b\*</sup> Parichehr Halaj Yazdi,<sup>a</sup> Seyedeh-Sara Hashemi <sup>c</sup> and Marzieh Behrouz <sup>a</sup>

*a) Department of Chemistry, Shiraz University of Technology, Shiraz 71555-313, Iran*

*b) Medicinal Chemistry Research Laboratory, Novel Technology for Health Research Center, Shiraz University of Technology, Shiraz 71555-313, Iran*

*c) Burn and Wound Healing Research Center, Division of Food and Nutrition, Shiraz University of Medical Sciences, Shiraz, Iran*

\*Corresponding authors. Tel.: +98 71 3735 4500; Fax: +98 71 3735 4520;

E-mail address: [soltani@sutech.ac.ir](mailto:soltani@sutech.ac.ir) (M.N. Soltani Rad); [behrouz@sutech.ac.ir](mailto:behrouz@sutech.ac.ir) (S. Behrouz)

## Table of Content

| <b>Content</b>                                         | <b>Page</b> |
|--------------------------------------------------------|-------------|
| InChI code of synthesized compounds                    | 3           |
| <sup>1</sup> HNMR and <sup>13</sup> CNMR of <b>11a</b> | 4           |
| <sup>1</sup> HNMR and <sup>13</sup> CNMR of <b>11b</b> | 5           |
| <sup>1</sup> HNMR and <sup>13</sup> CNMR of <b>11c</b> | 6           |
| <sup>1</sup> HNMR and <sup>13</sup> CNMR of <b>11d</b> | 7           |
| <sup>1</sup> HNMR and <sup>13</sup> CNMR of <b>11e</b> | 8           |
| <sup>1</sup> HNMR and <sup>13</sup> CNMR of <b>11f</b> | 9           |
| <sup>1</sup> HNMR and <sup>13</sup> CNMR of <b>11g</b> | 10          |
| <sup>1</sup> HNMR and <sup>13</sup> CNMR of <b>11h</b> | 11          |
| <sup>1</sup> HNMR and <sup>13</sup> CNMR of <b>11i</b> | 12          |
| <sup>1</sup> HNMR and <sup>13</sup> CNMR of <b>11j</b> | 13          |
| <sup>1</sup> HNMR and <sup>13</sup> CNMR of <b>11k</b> | 14          |
| <sup>1</sup> HNMR and <sup>13</sup> CNMR of <b>11l</b> | 15          |

## InChI code of synthesized compounds

| Entry | Compound | Structure                                                                           | InChI code                  |
|-------|----------|-------------------------------------------------------------------------------------|-----------------------------|
| 1     | 11a      | 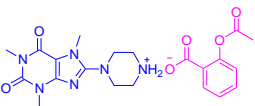   | RTVPEXRKOCYFB-UHFFFAOYSA-N  |
| 2     | 11b      |    | RTQOMZFSRXAASL-UHFFFAOYSA-N |
| 3     | 11c      |    | LJZLRWKQYDSGRY-UHFFFAOYSA-N |
| 4     | 11d      |    | STOSHLZQDWAHM-UHFFFAOYSA-N  |
| 5     | 11e      |    | QBUZHYQVTFABNR-UHFFFAOYSA-N |
| 6     | 11f      |    | WLZDDKOKUSZKBQ-UHFFFAOYSA-N |
| 7     | 11g      |  | AMAZCQRHBIZHCF-UHFFFAOYSA-N |
| 8     | 11h      |  | XDEUOMOECMASPJ-UHFFFAOYSA-N |
| 9     | 11i      |  | BTMRMKNJVPVHDO-UHFFFAOYSA-N |
| 10    | 11j      |  | YEVVCGDHOKXKNN-UHFFFAOYSA-N |
| 11    | 11k      |  | OJHKNNKOMDDDJC-UHFFFAOYSA-N |
| 12    | 11l      |  | ADOWSLJKCIWZFG-UHFFFAOYSA-N |

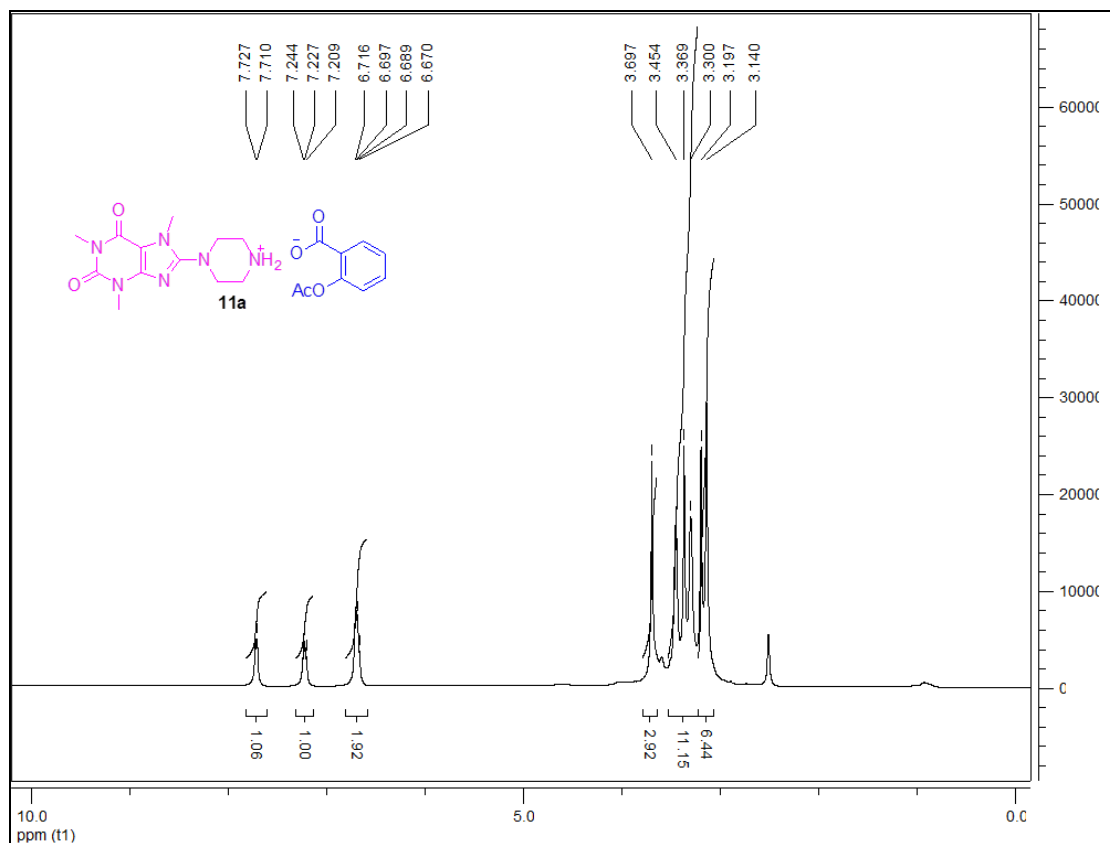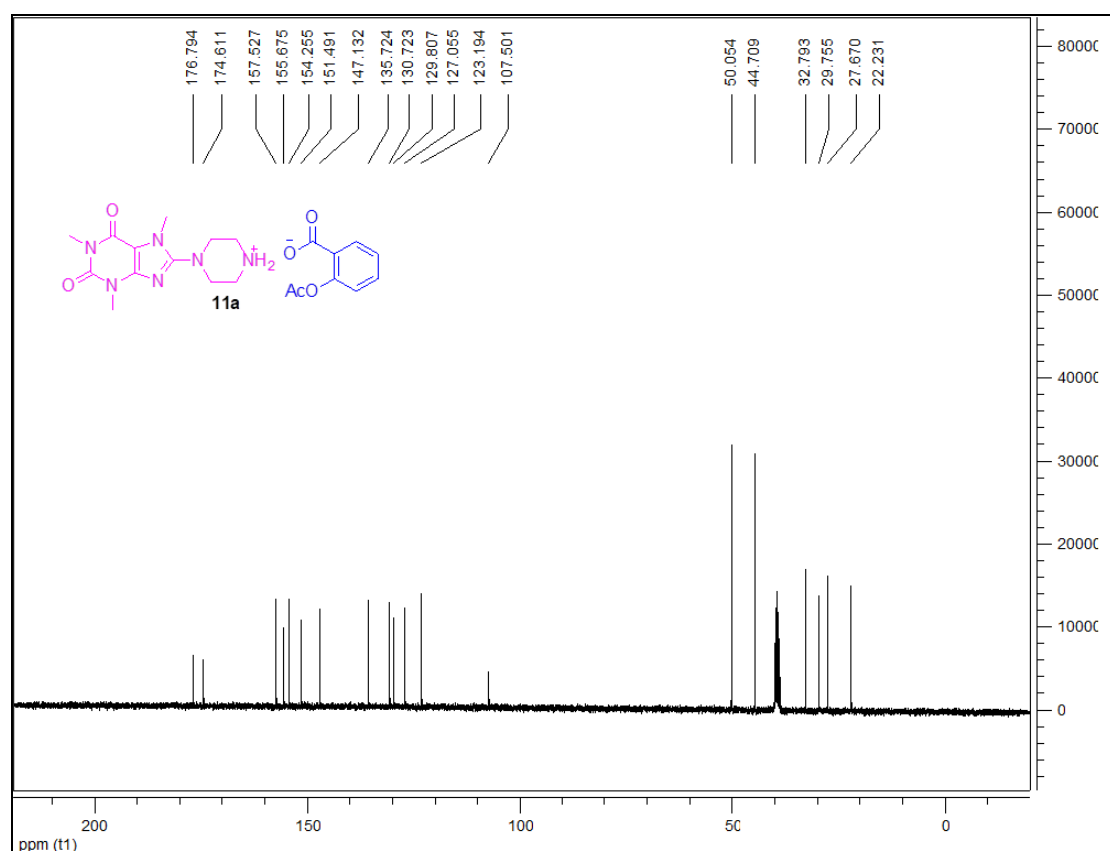

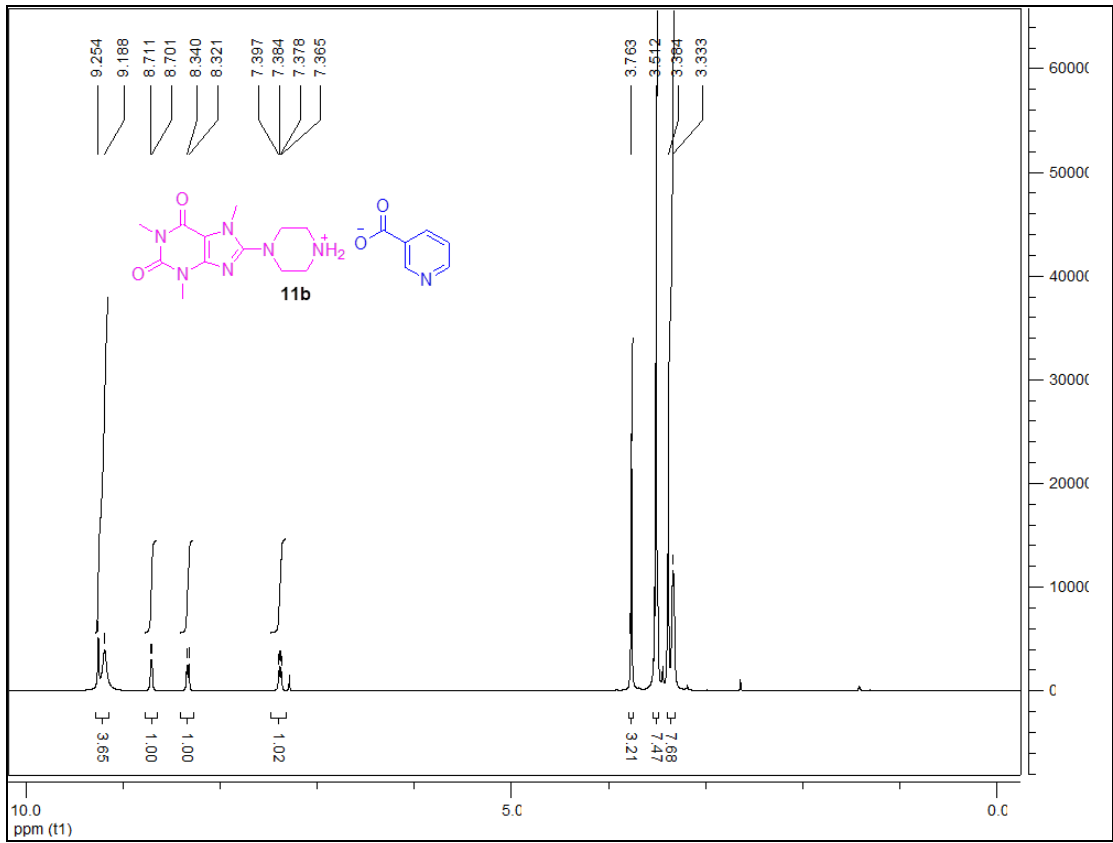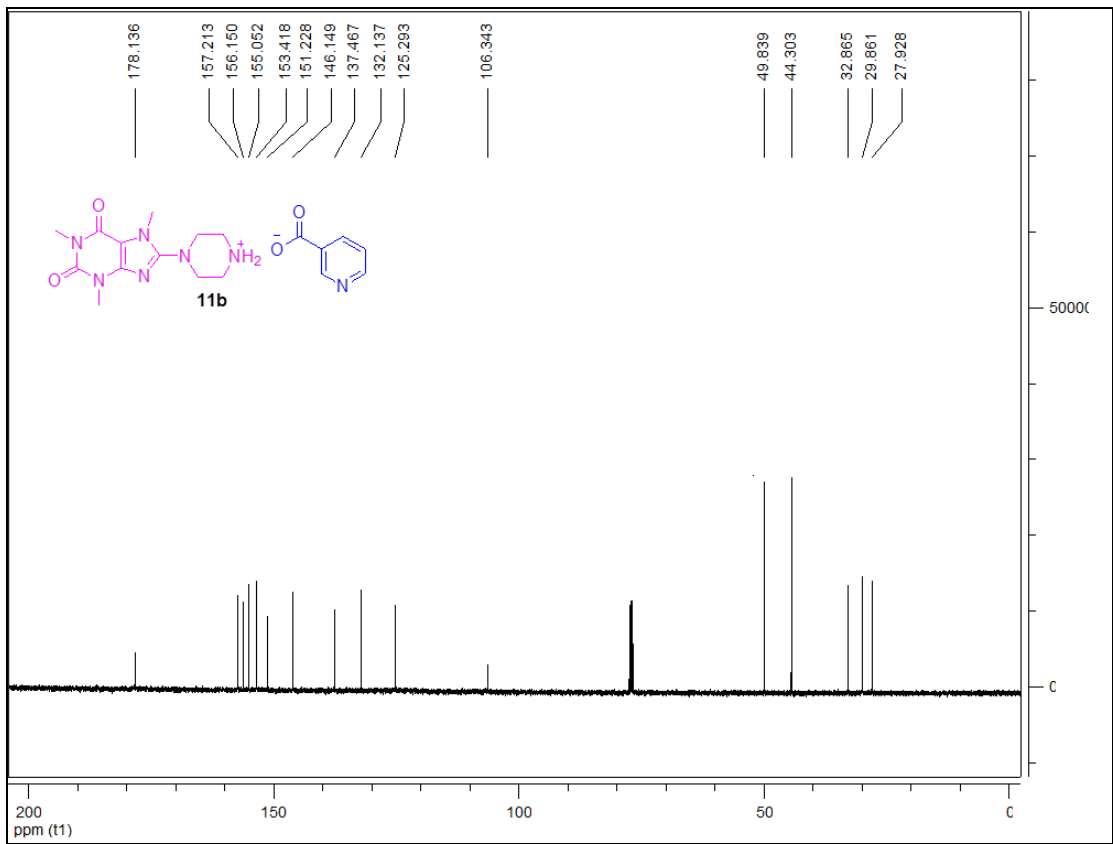

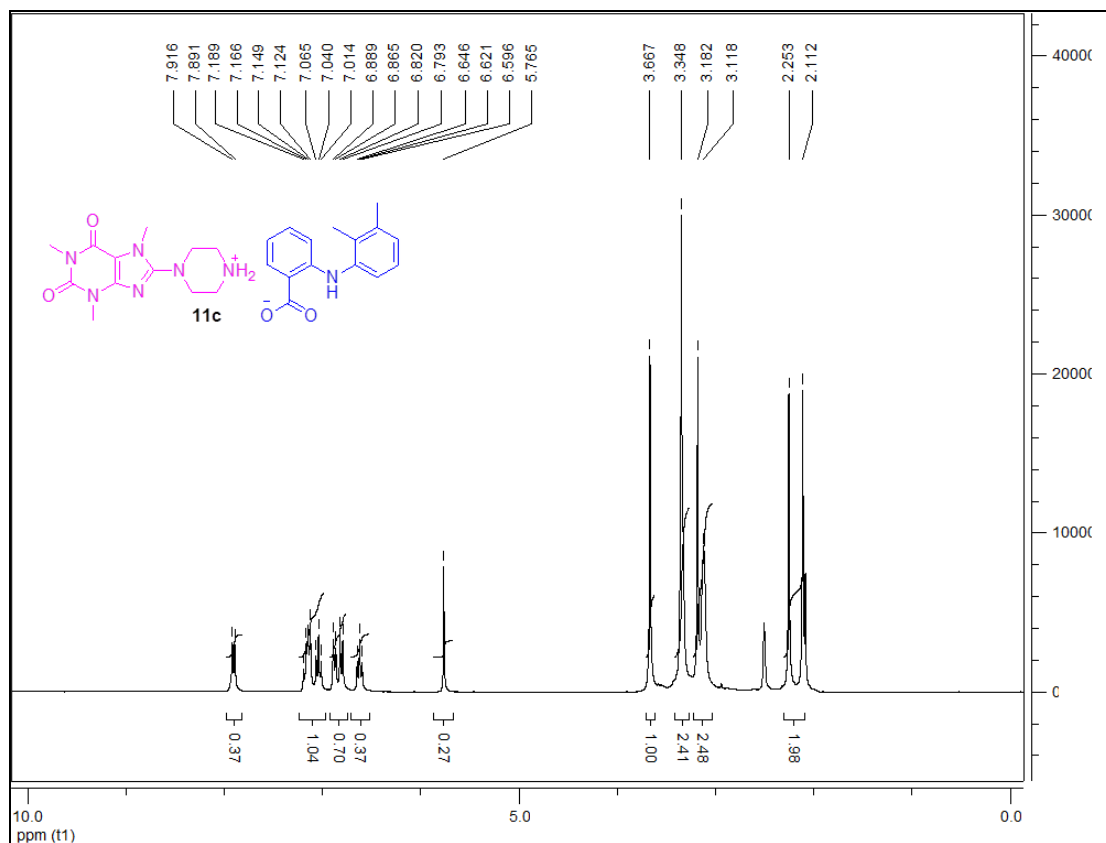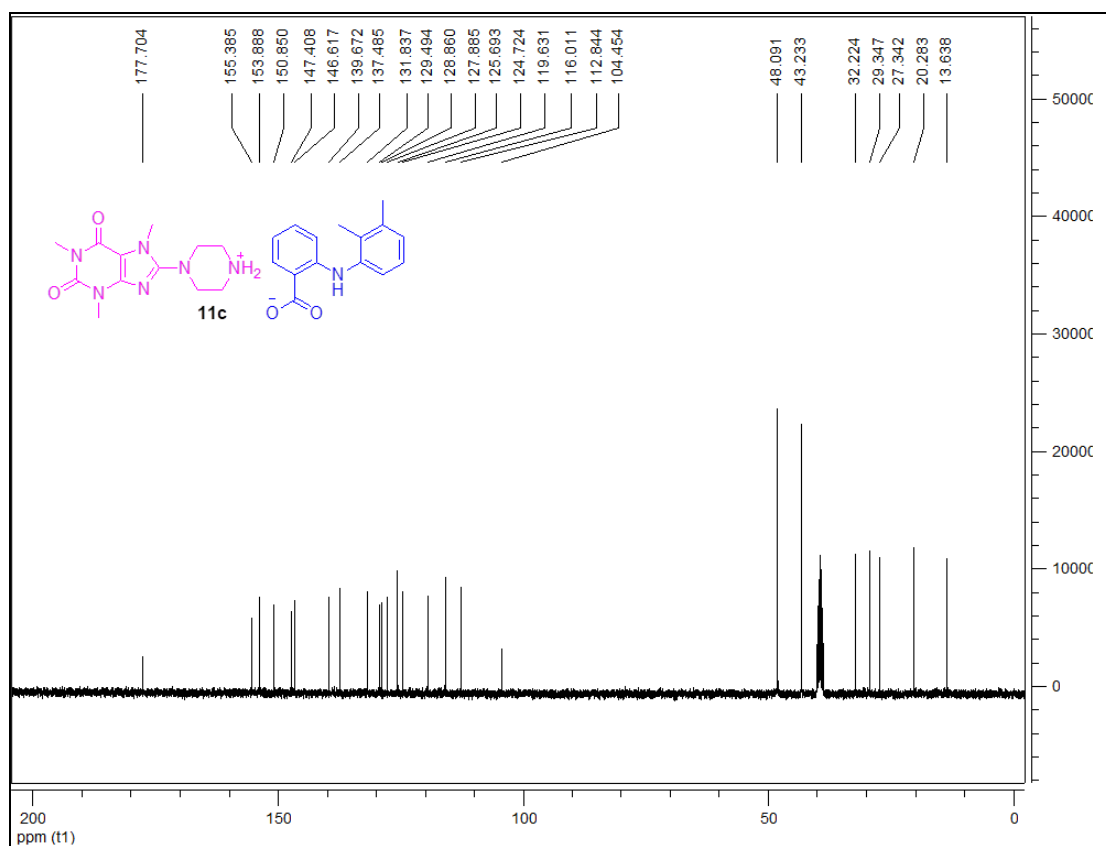

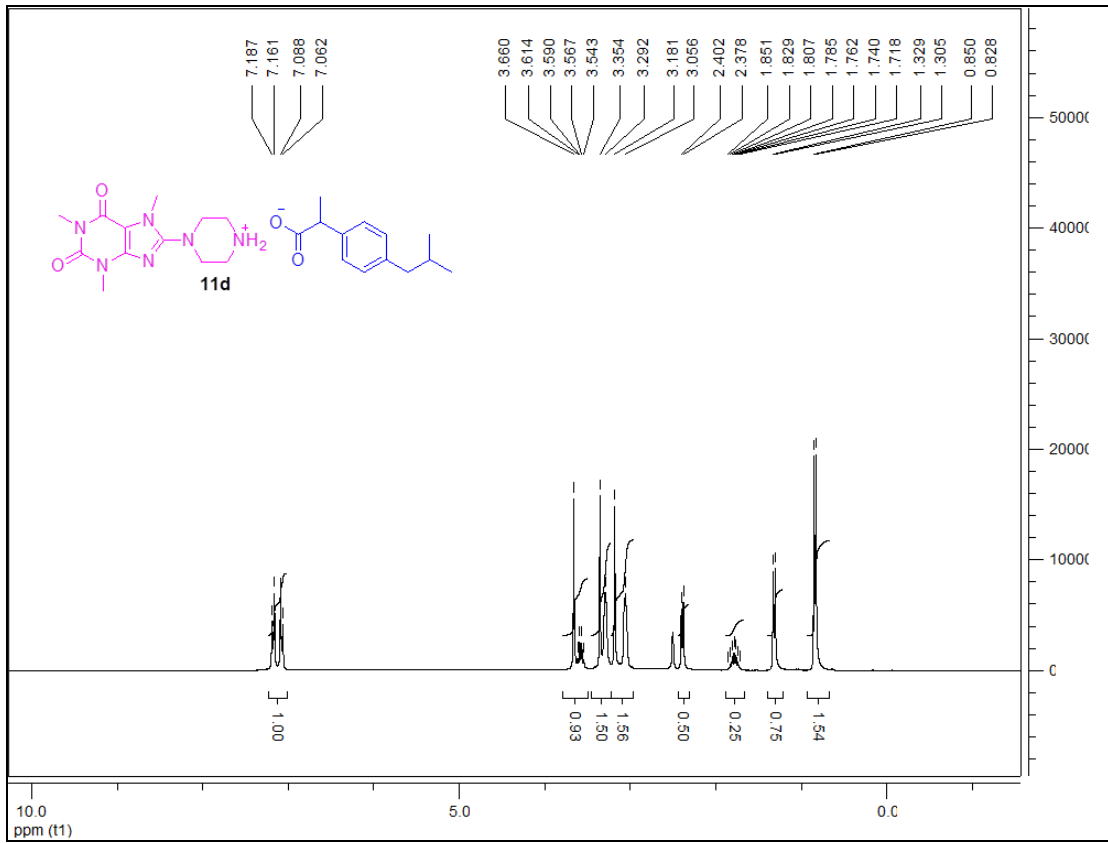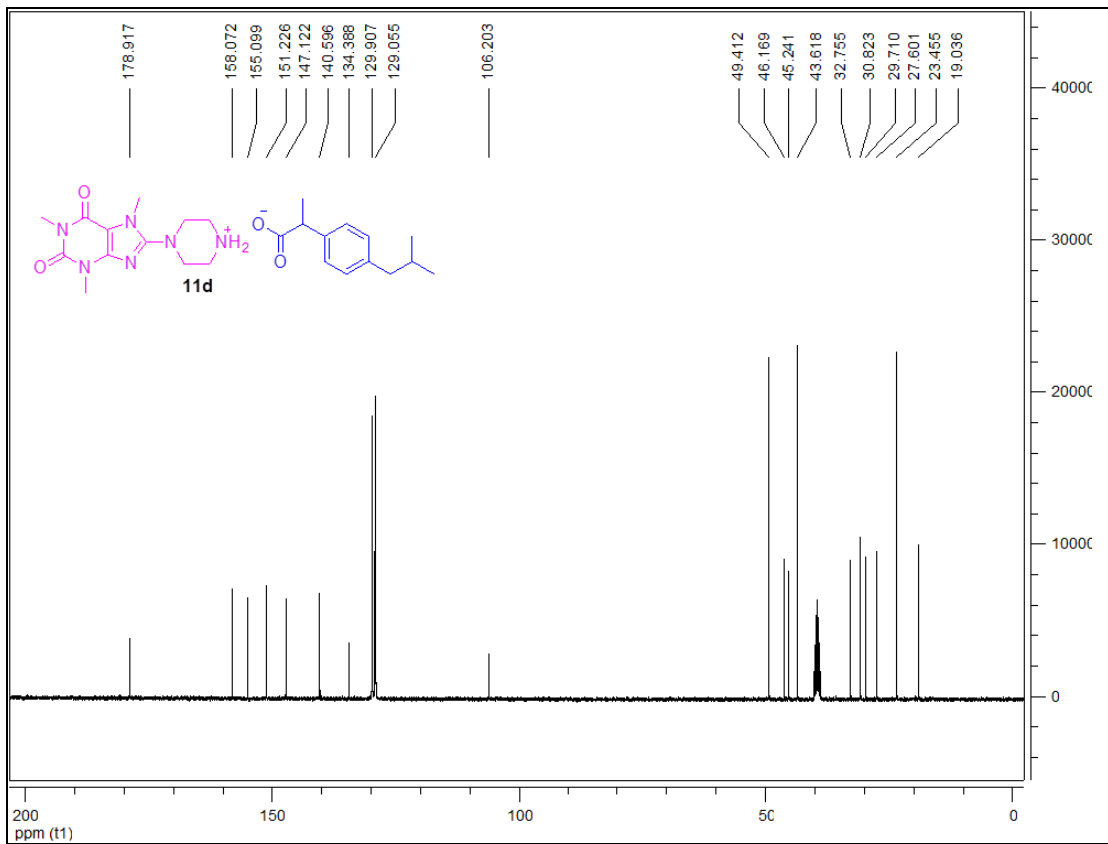

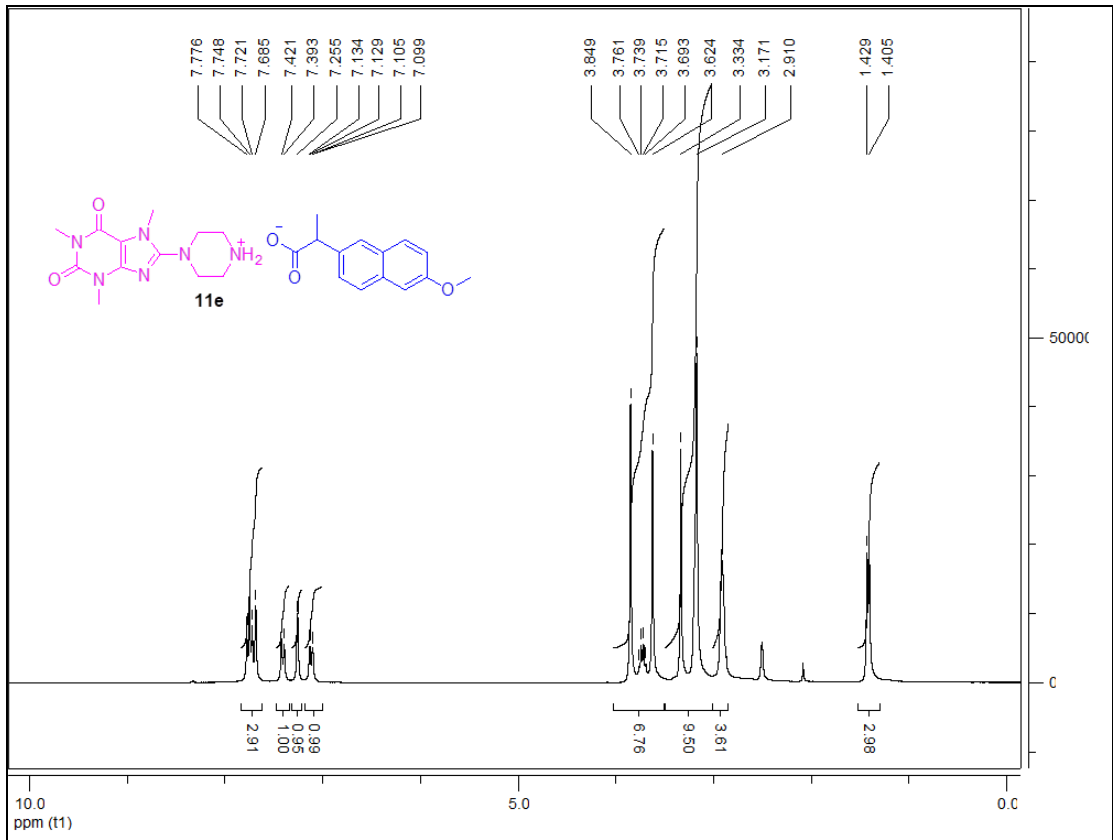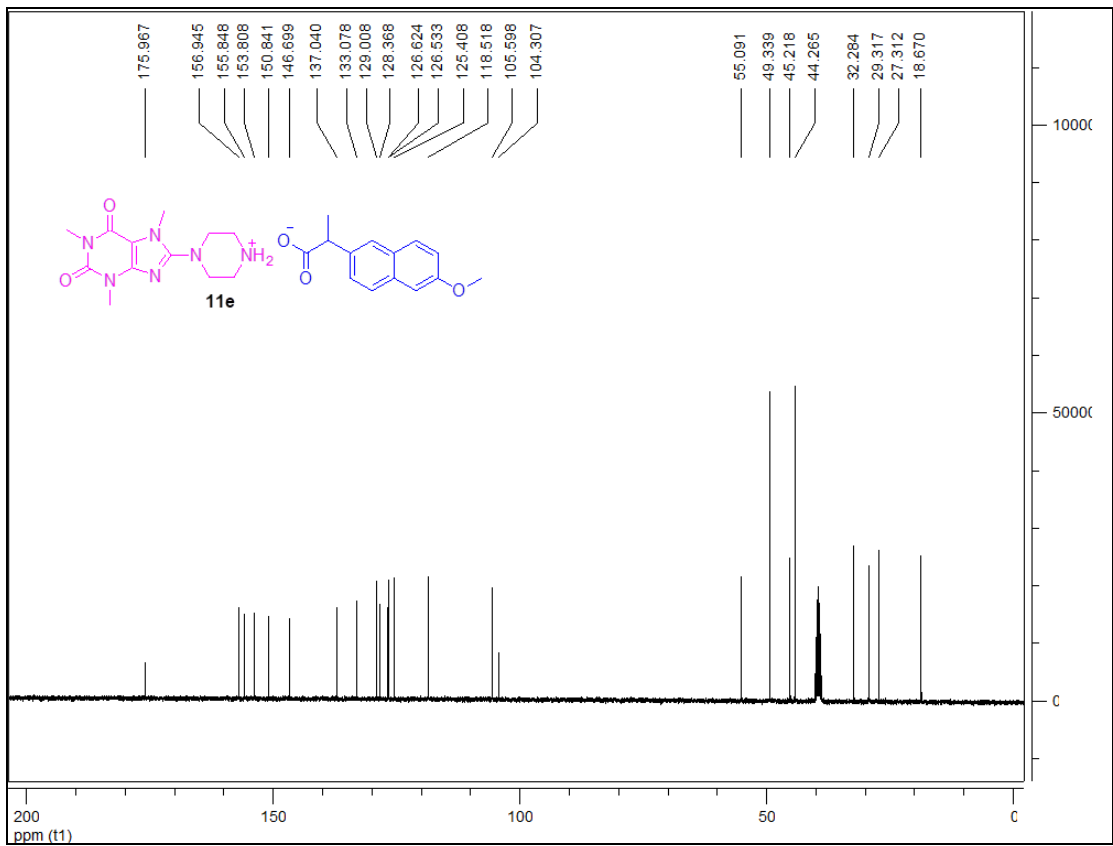



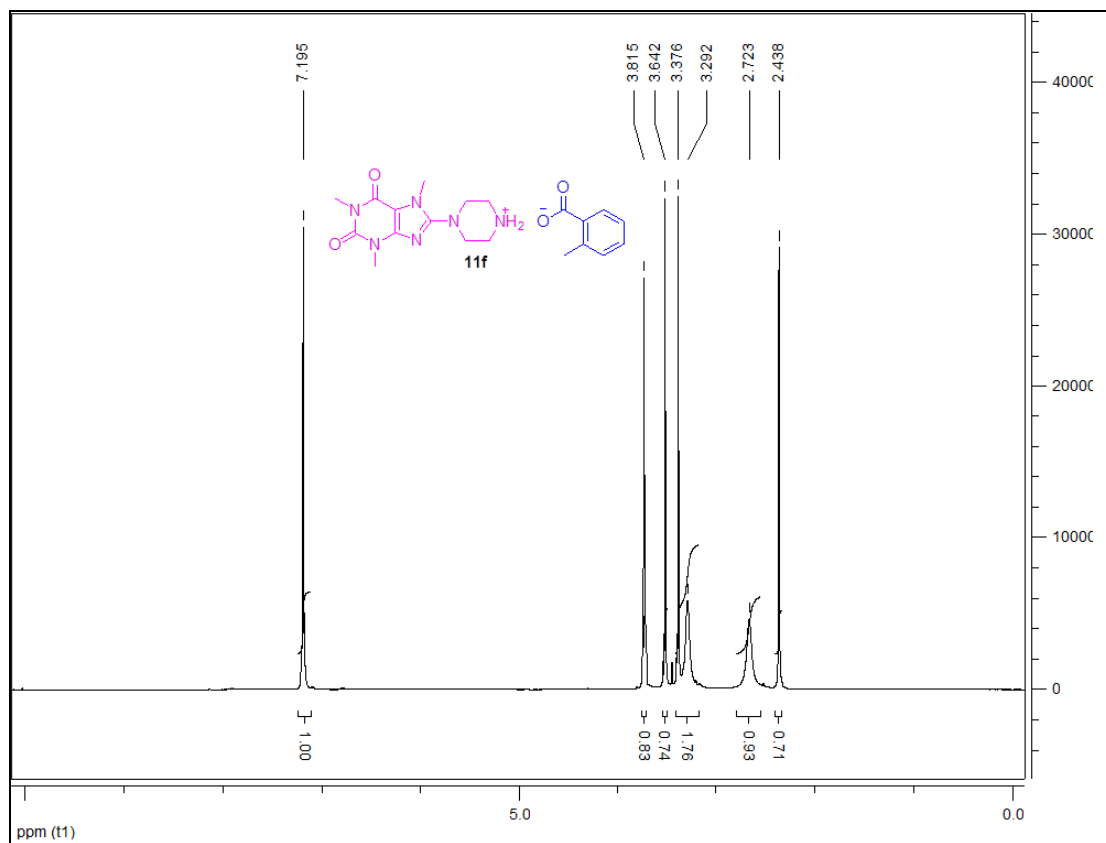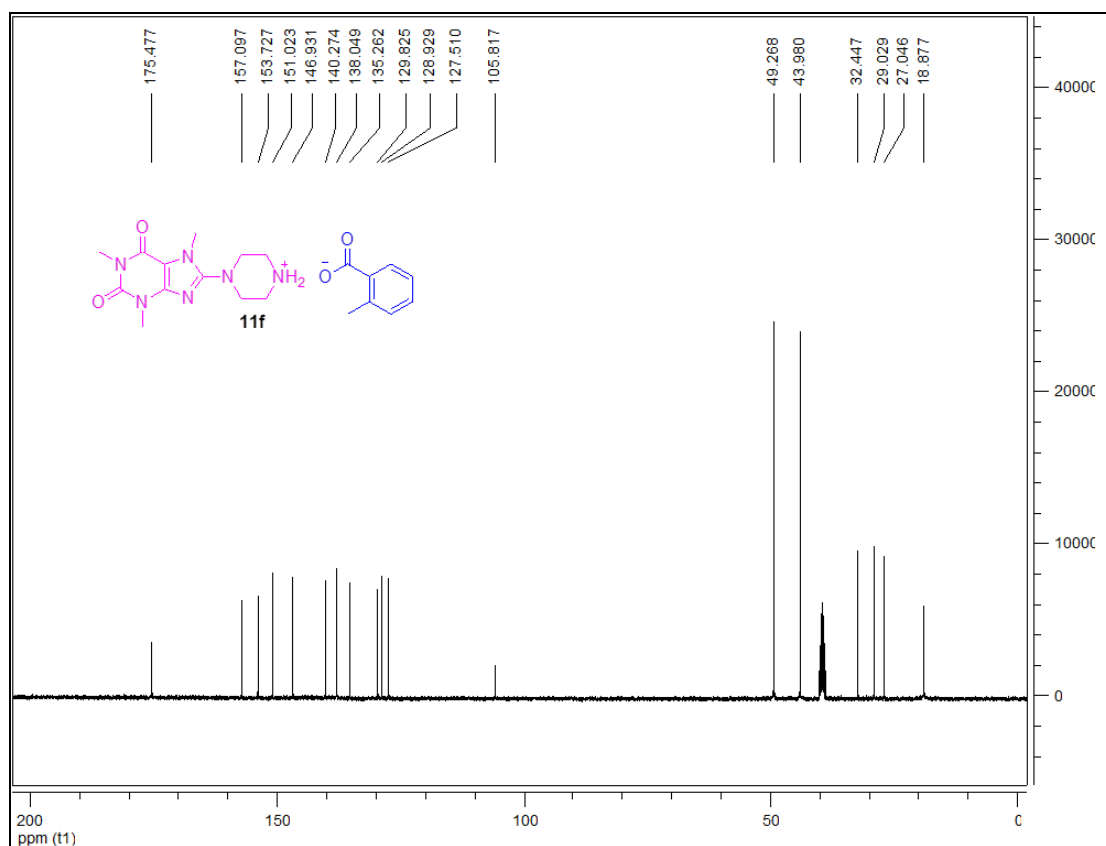

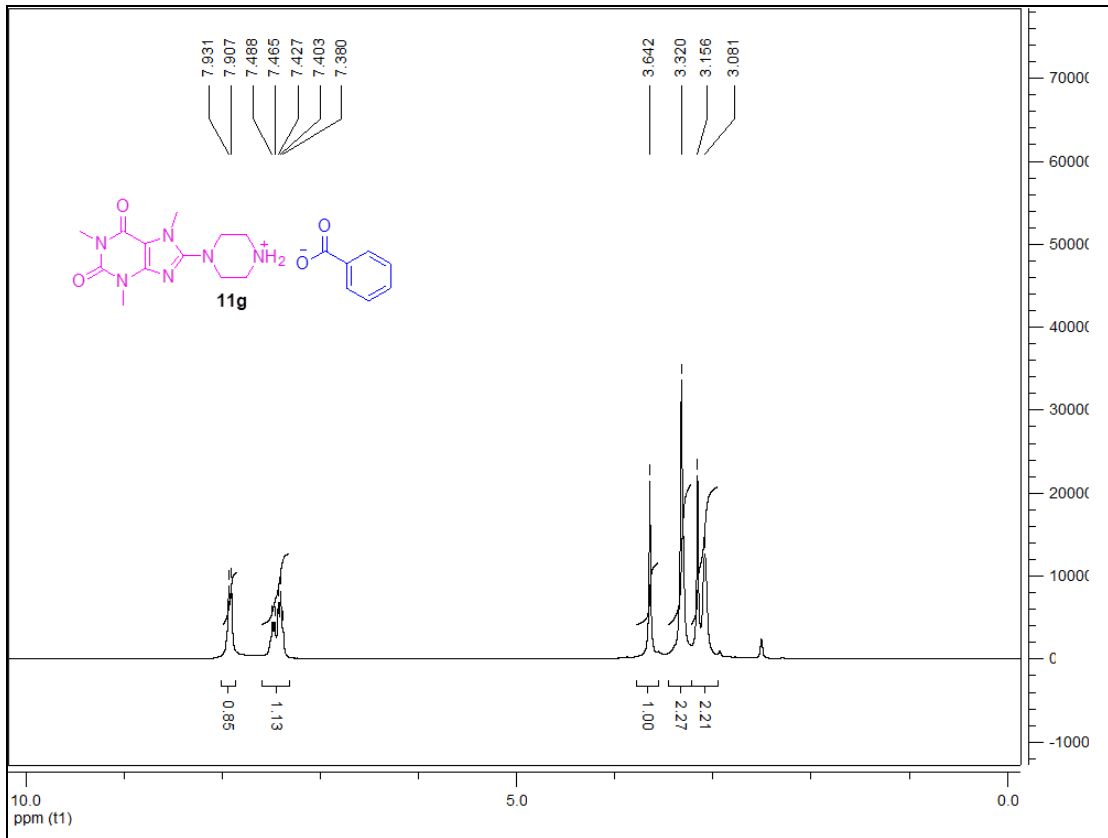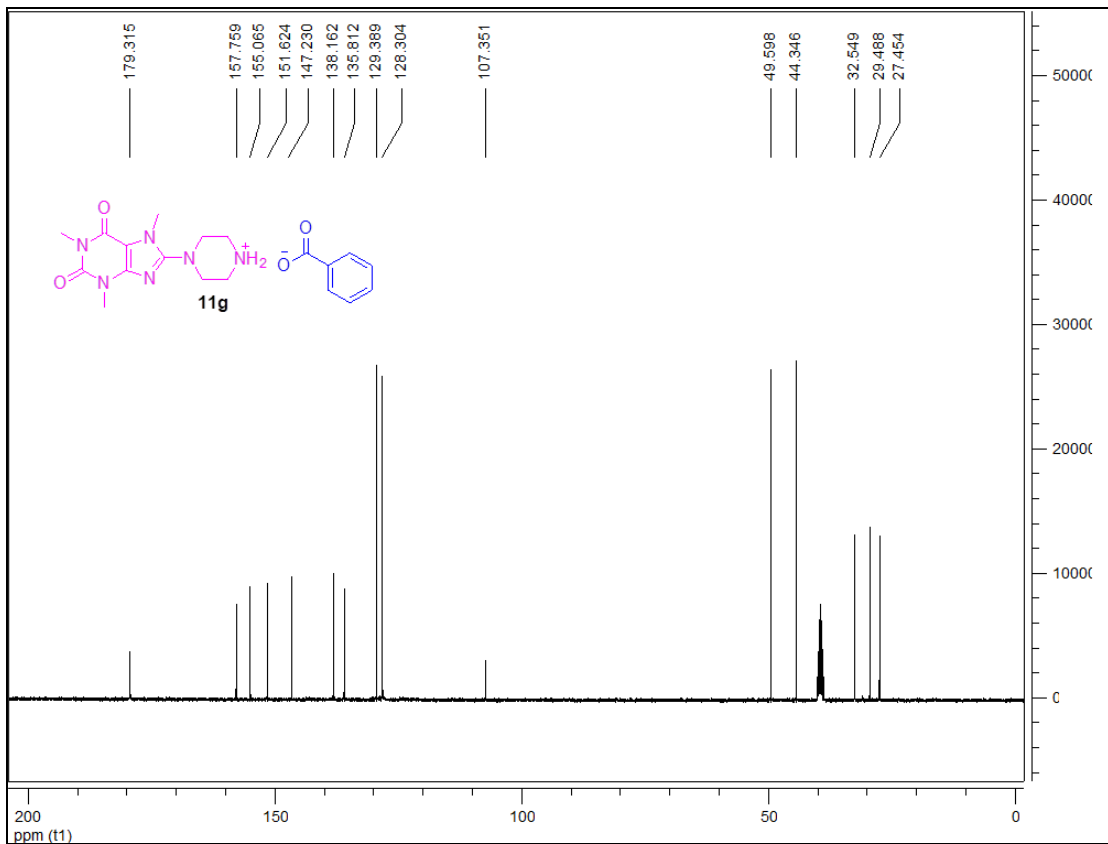

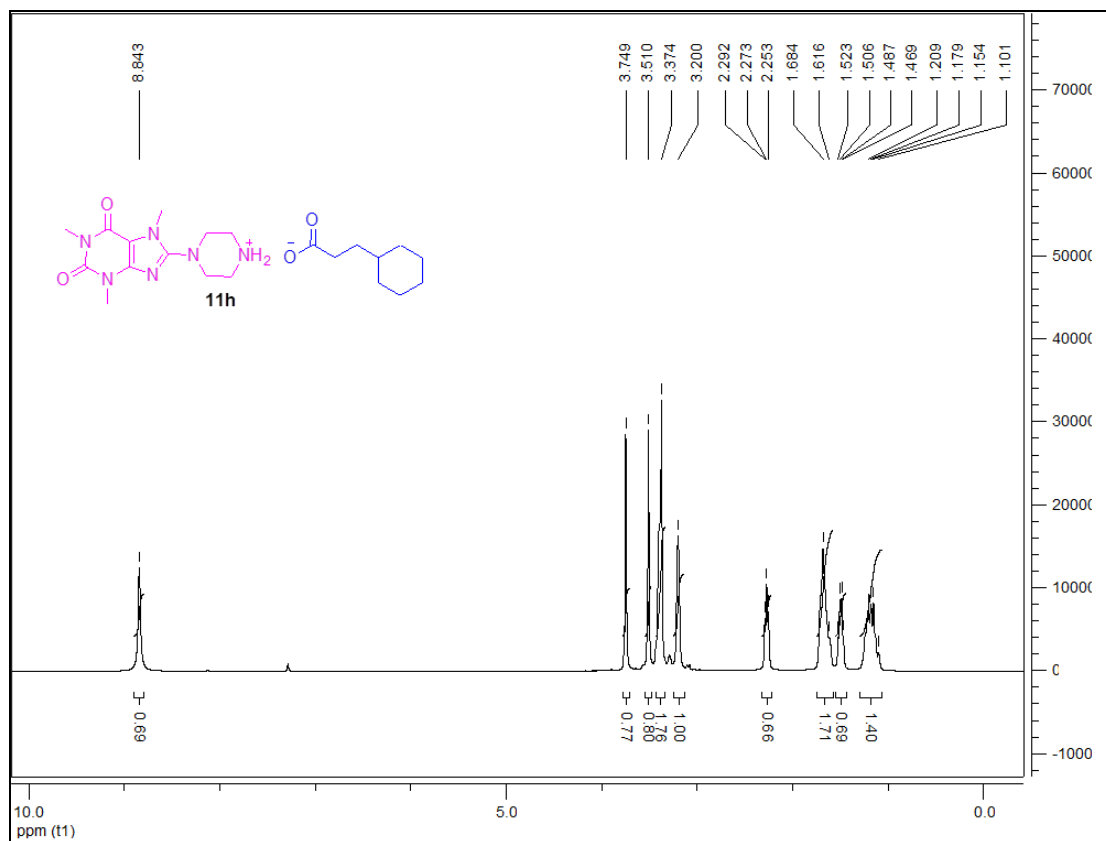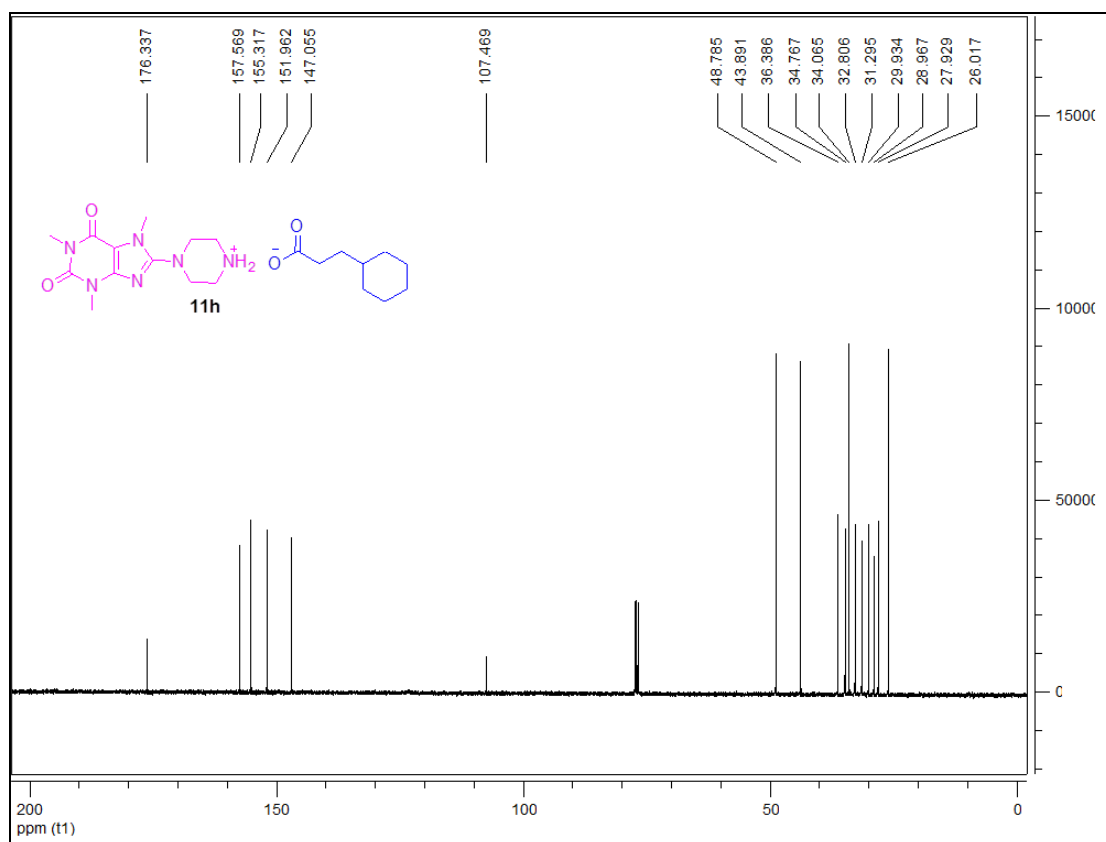

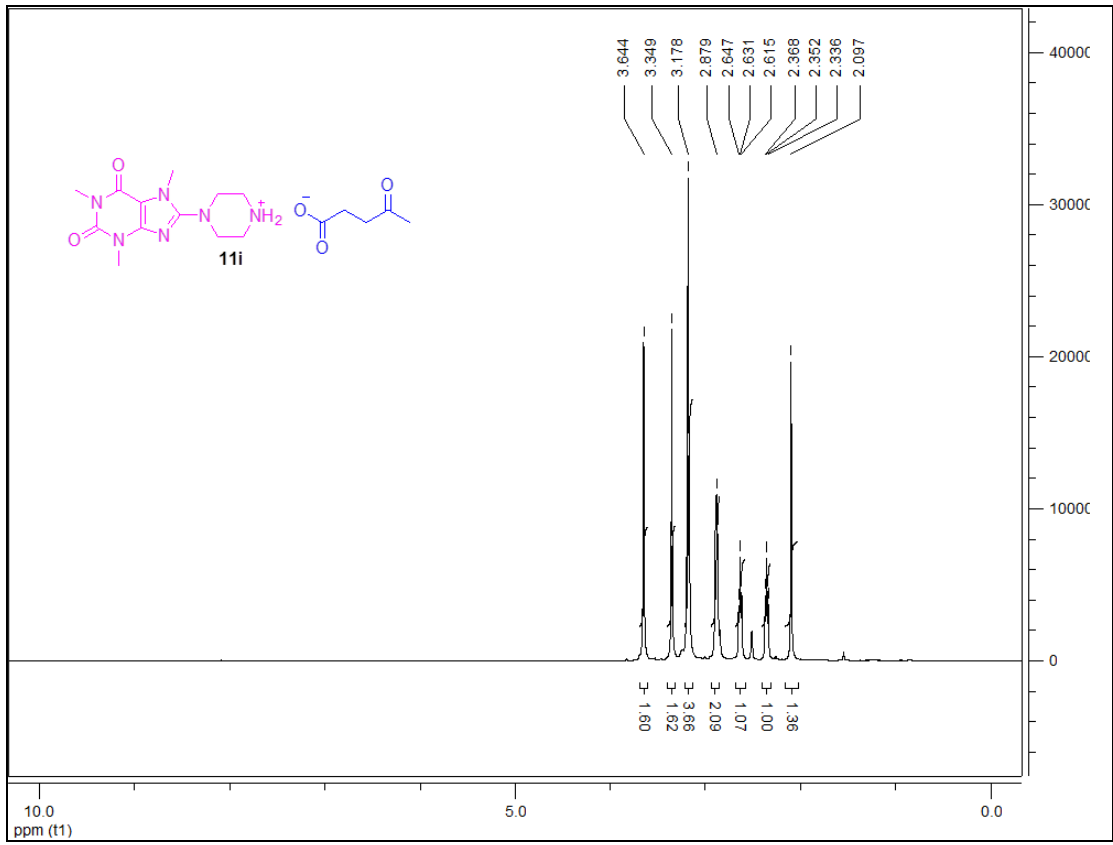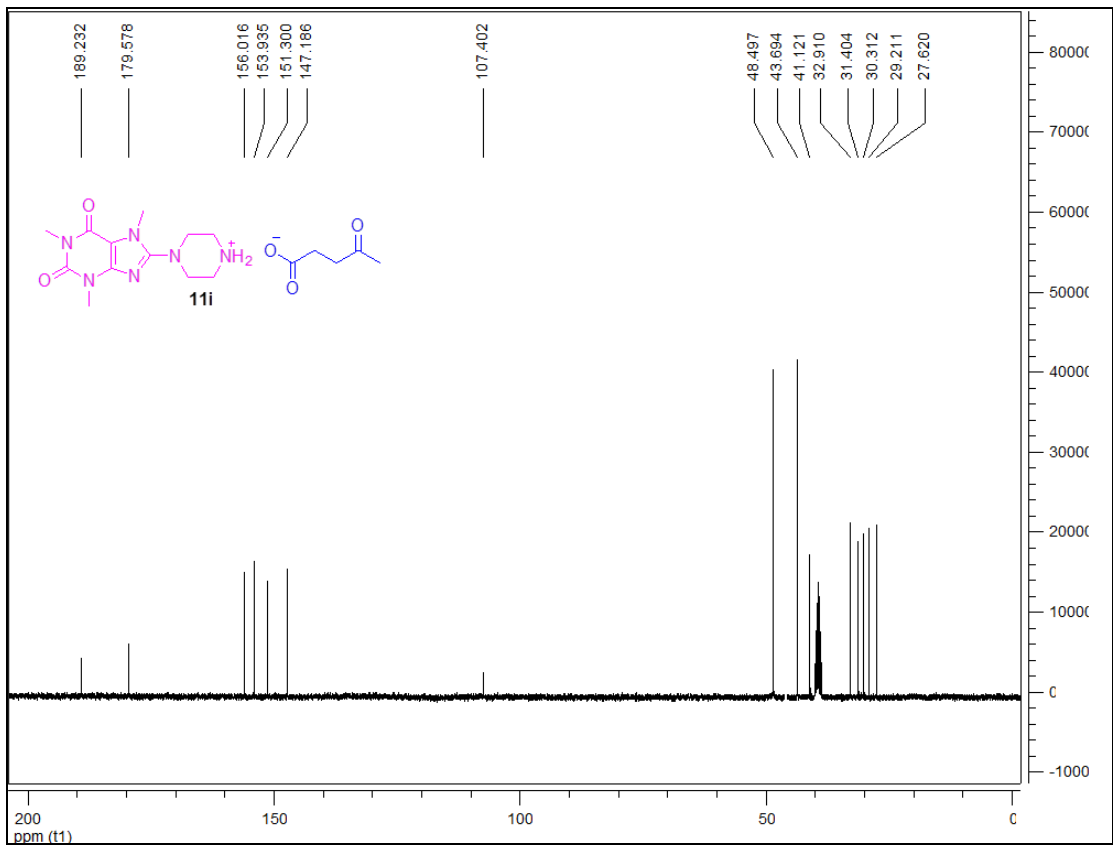

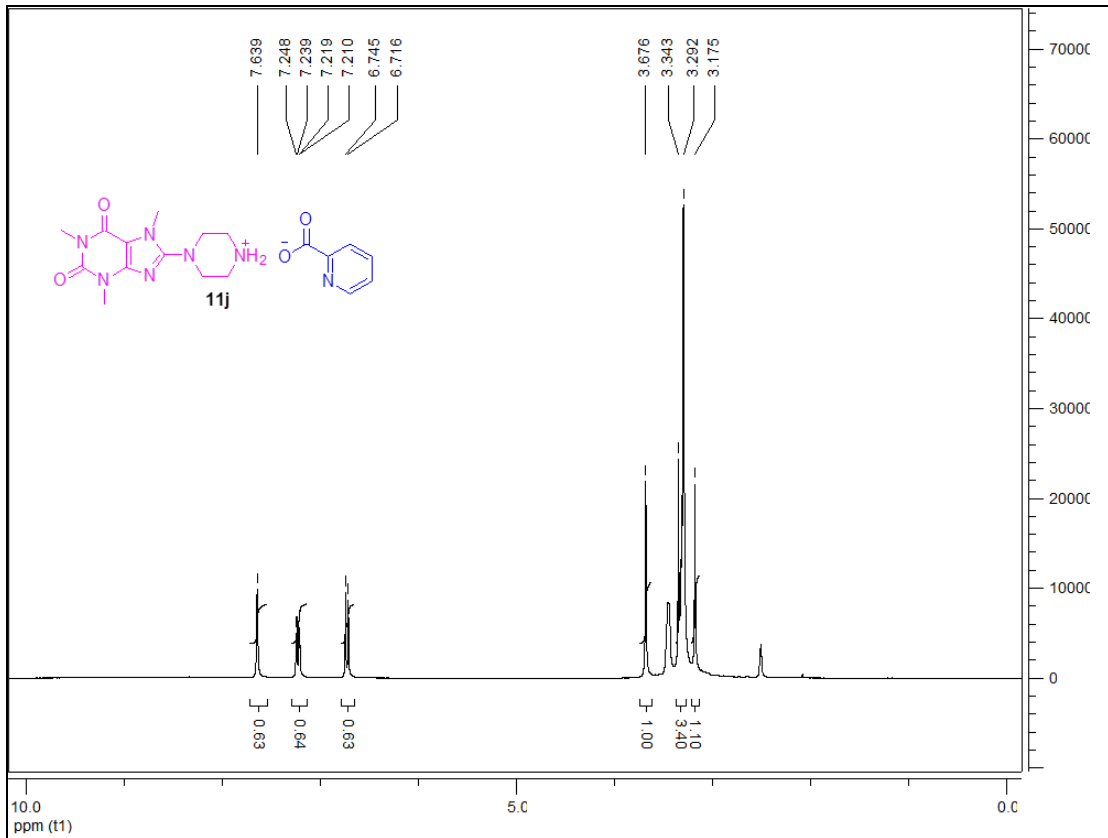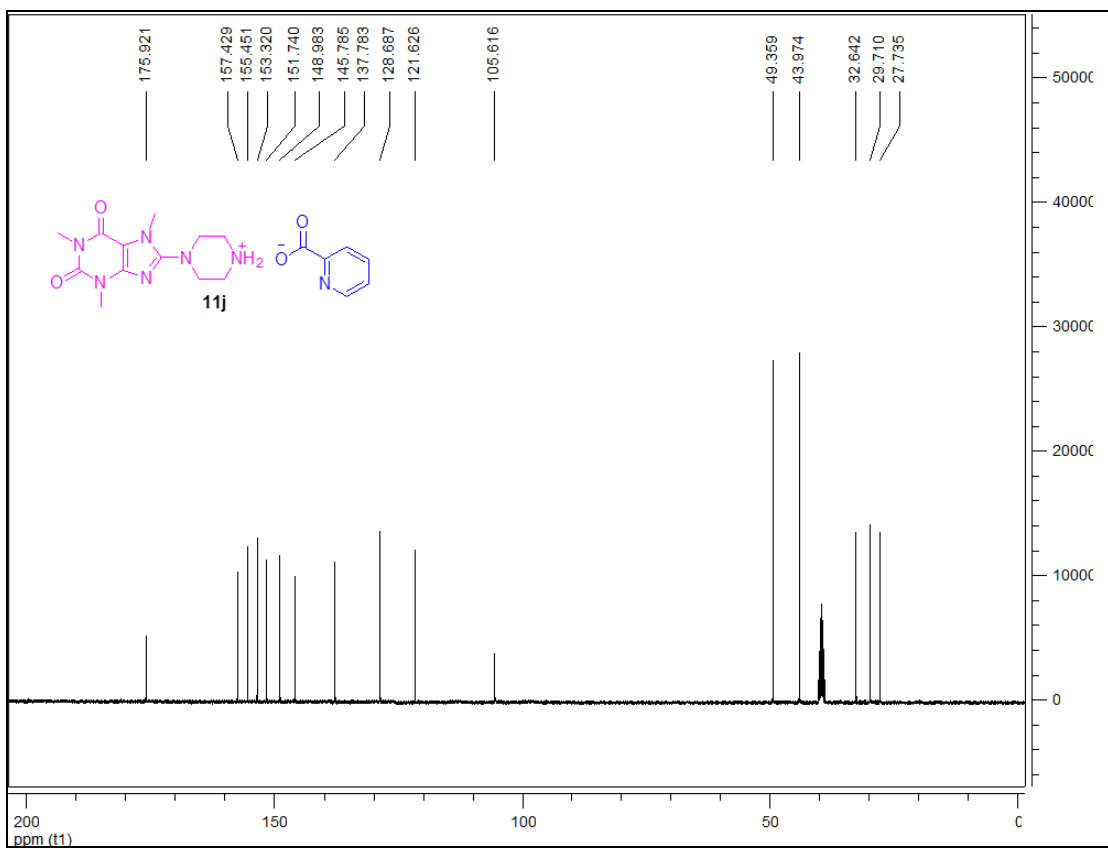

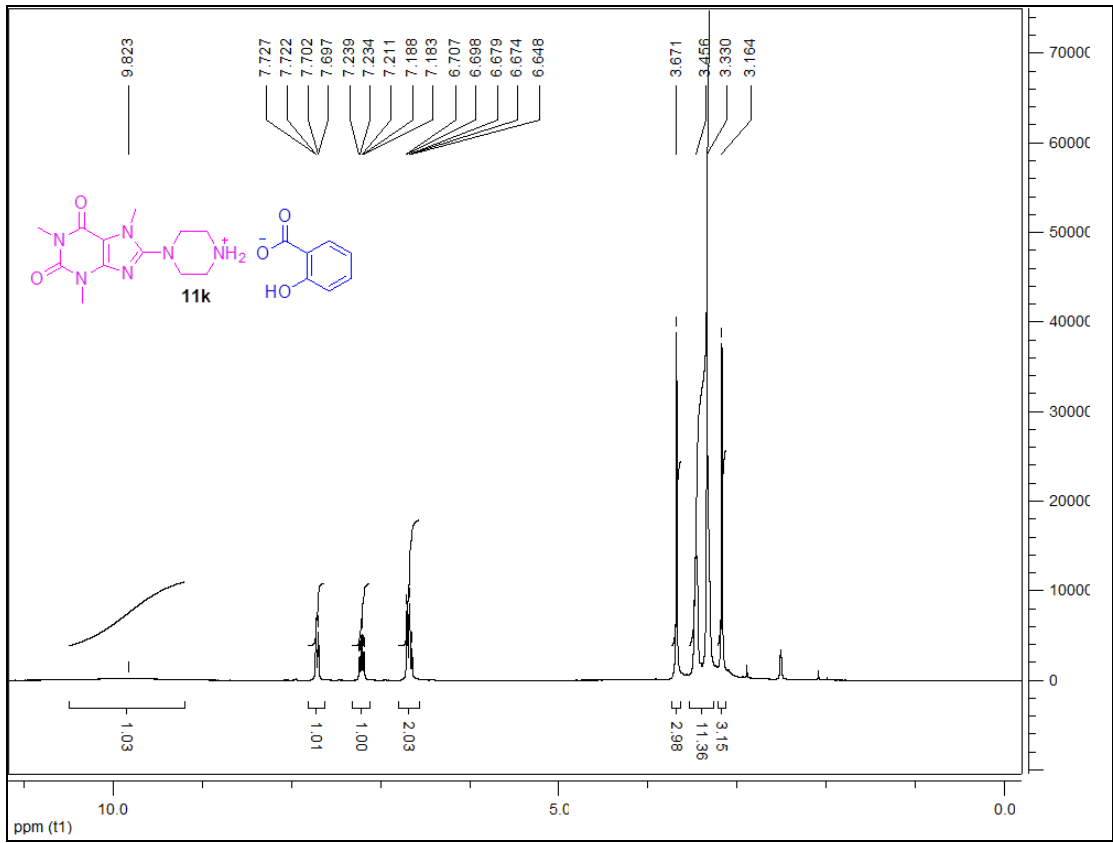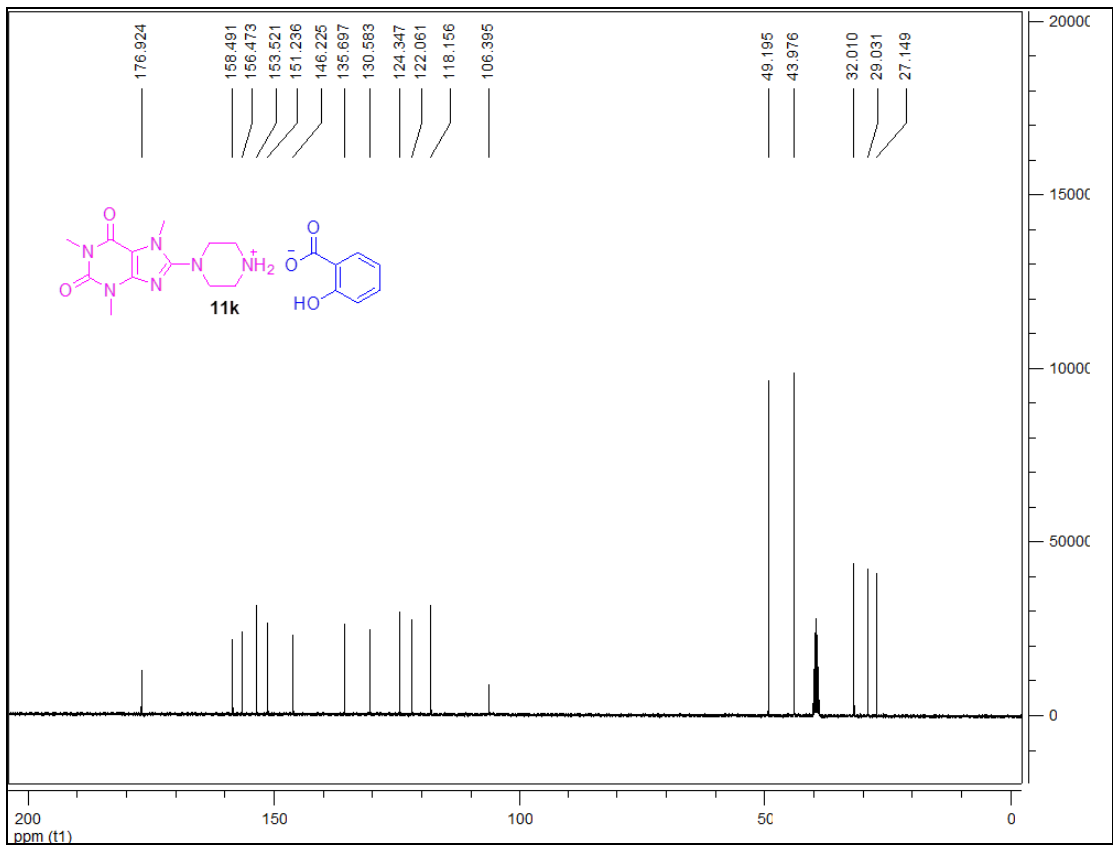

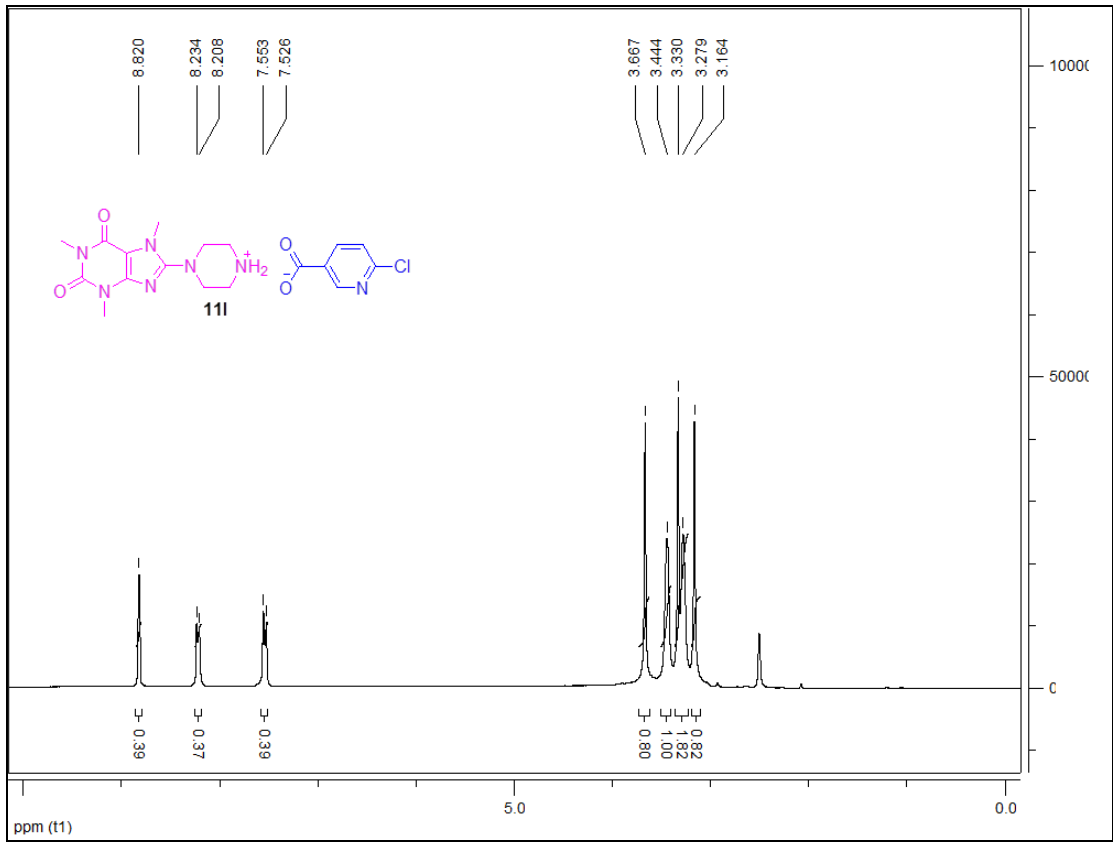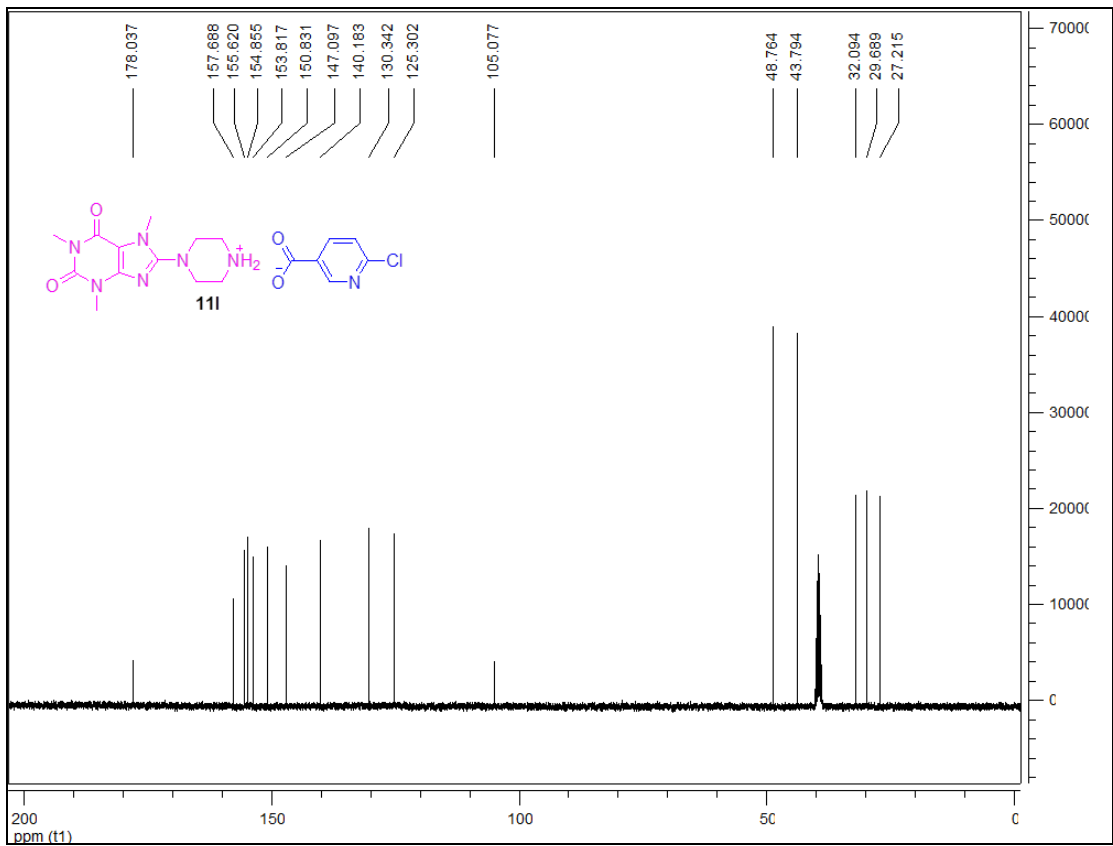

Supplement: d4ra06244b1.pdf [file d4ra06244b1.pdf]
